# Supplementary material
Source: PubMed Central journal article supplement (PMC1691857)
Supplement: 15539350s01.pdf [file 15539350s01.pdf]

This is an electronic appendix to the paper by Stuart-Fox & Ord 2004 Sexual selection, natural selection and the evolution of dimorphic coloration and ornamentation in agamid lizards. *Proc. R. Soc. Lond. B* **271**, 2249-2255. (doi:10.1098/rspb.2004.2802)

Electronic appendices are refereed with the text. However, no attempt is made to impose a uniform editorial style on the electronic appendices.

Electronic Appendix A (see following pages)

Figure 1

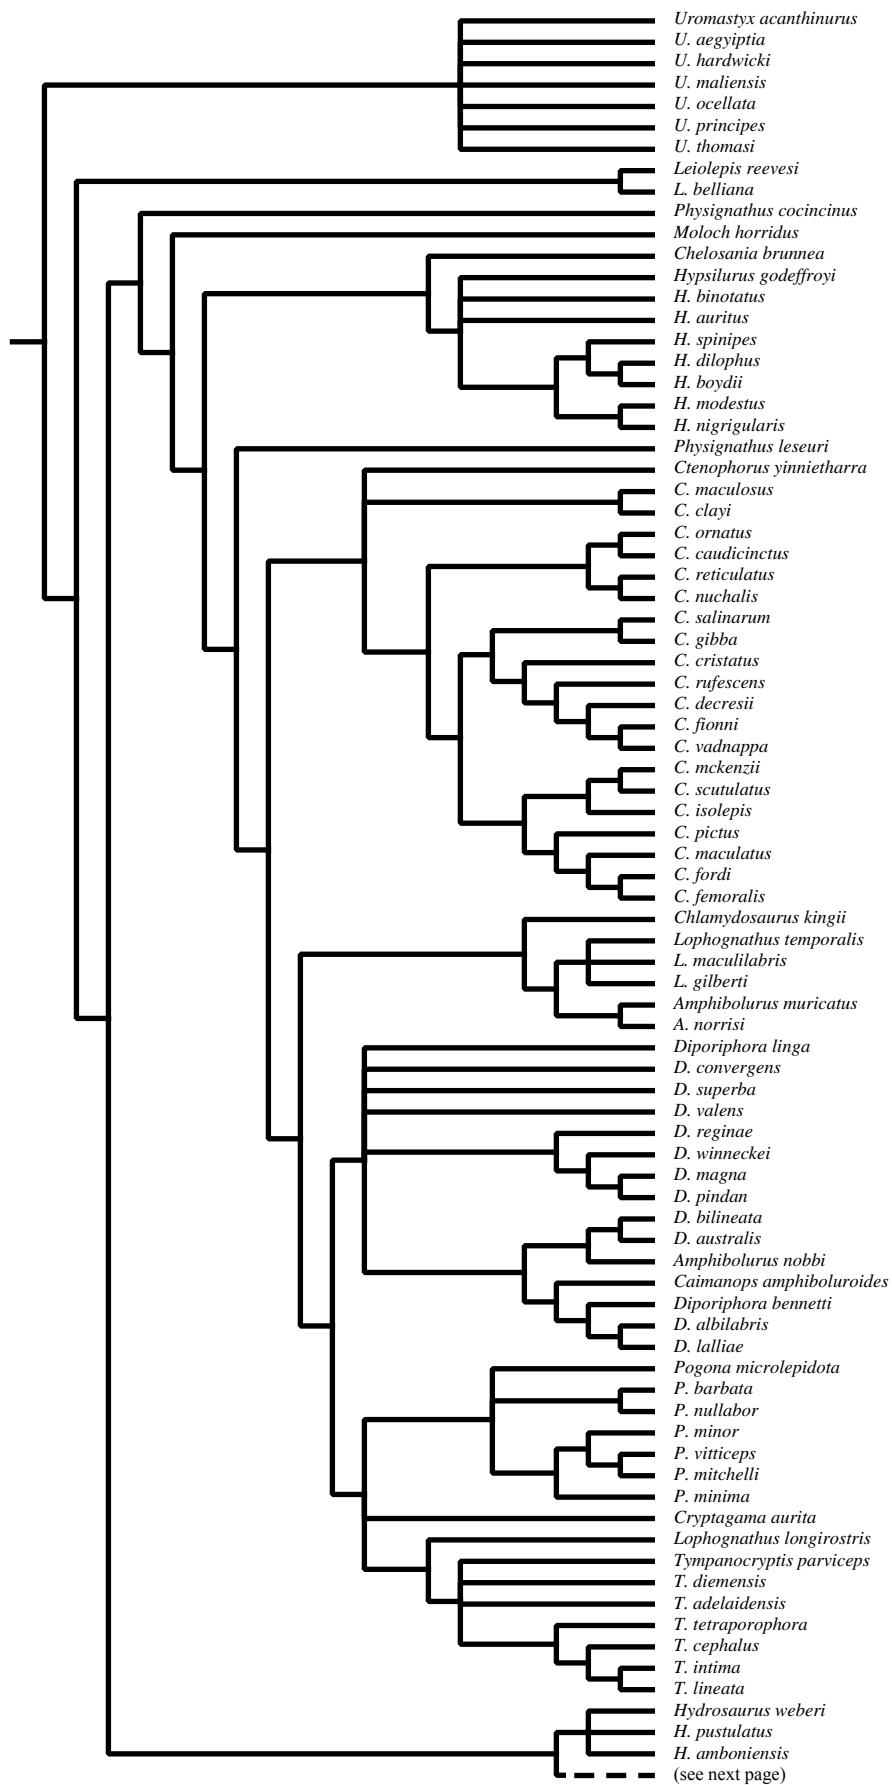

Figure 1 (continued)

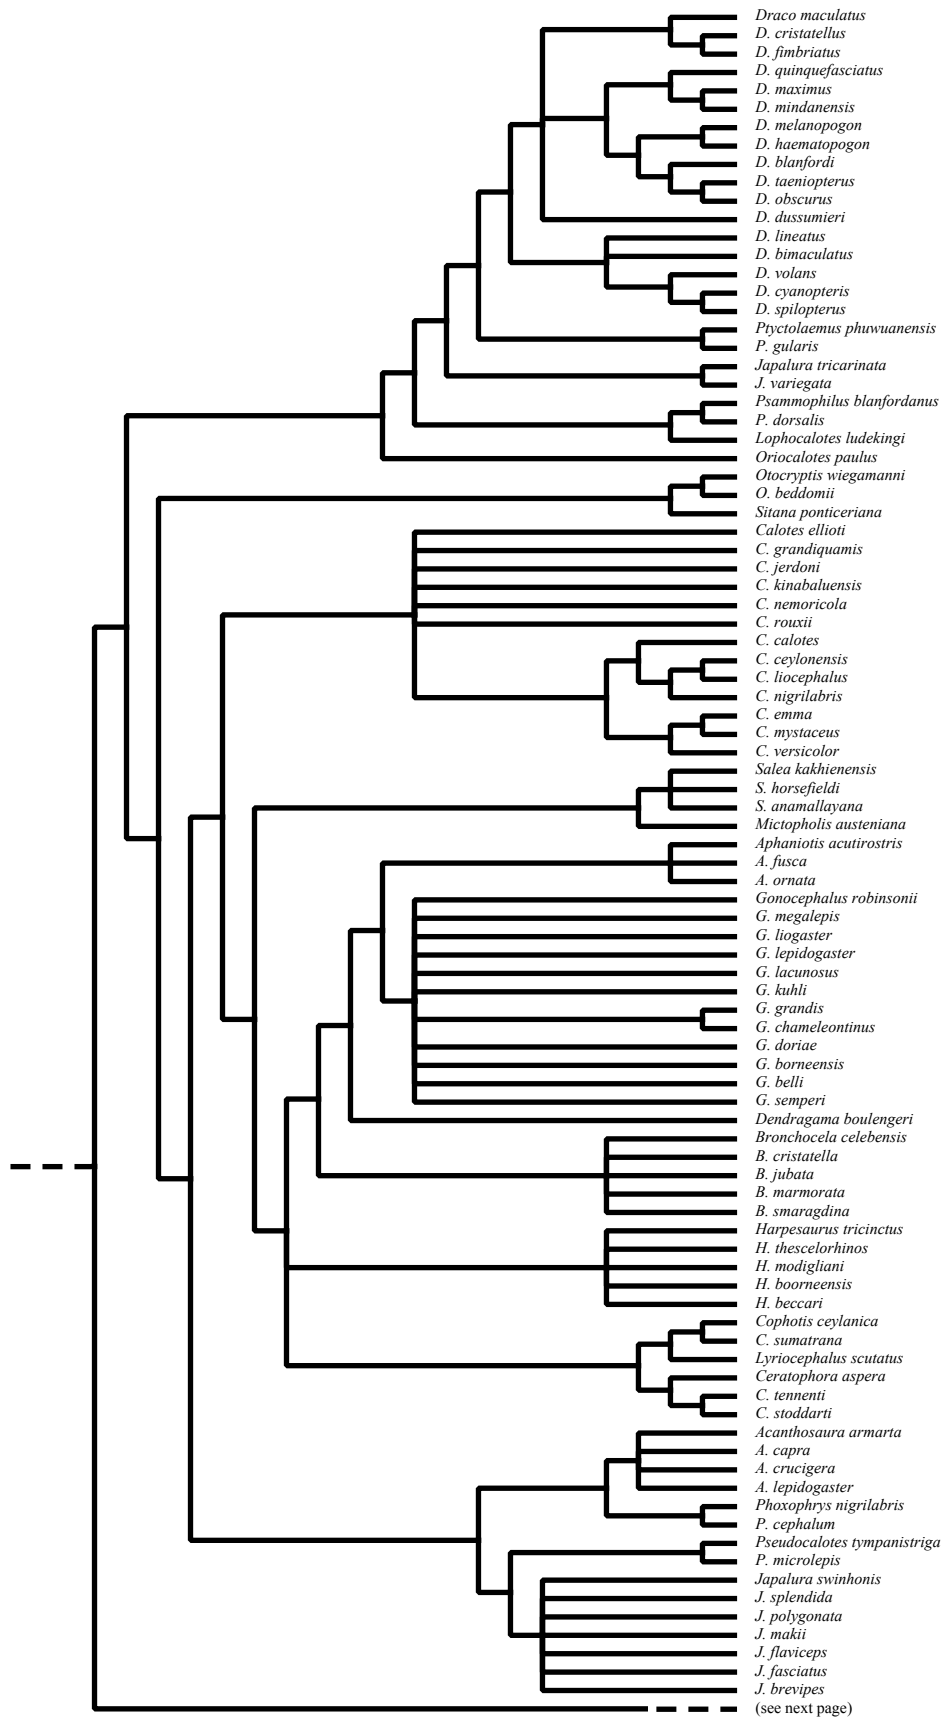

Figure 1 (continued)

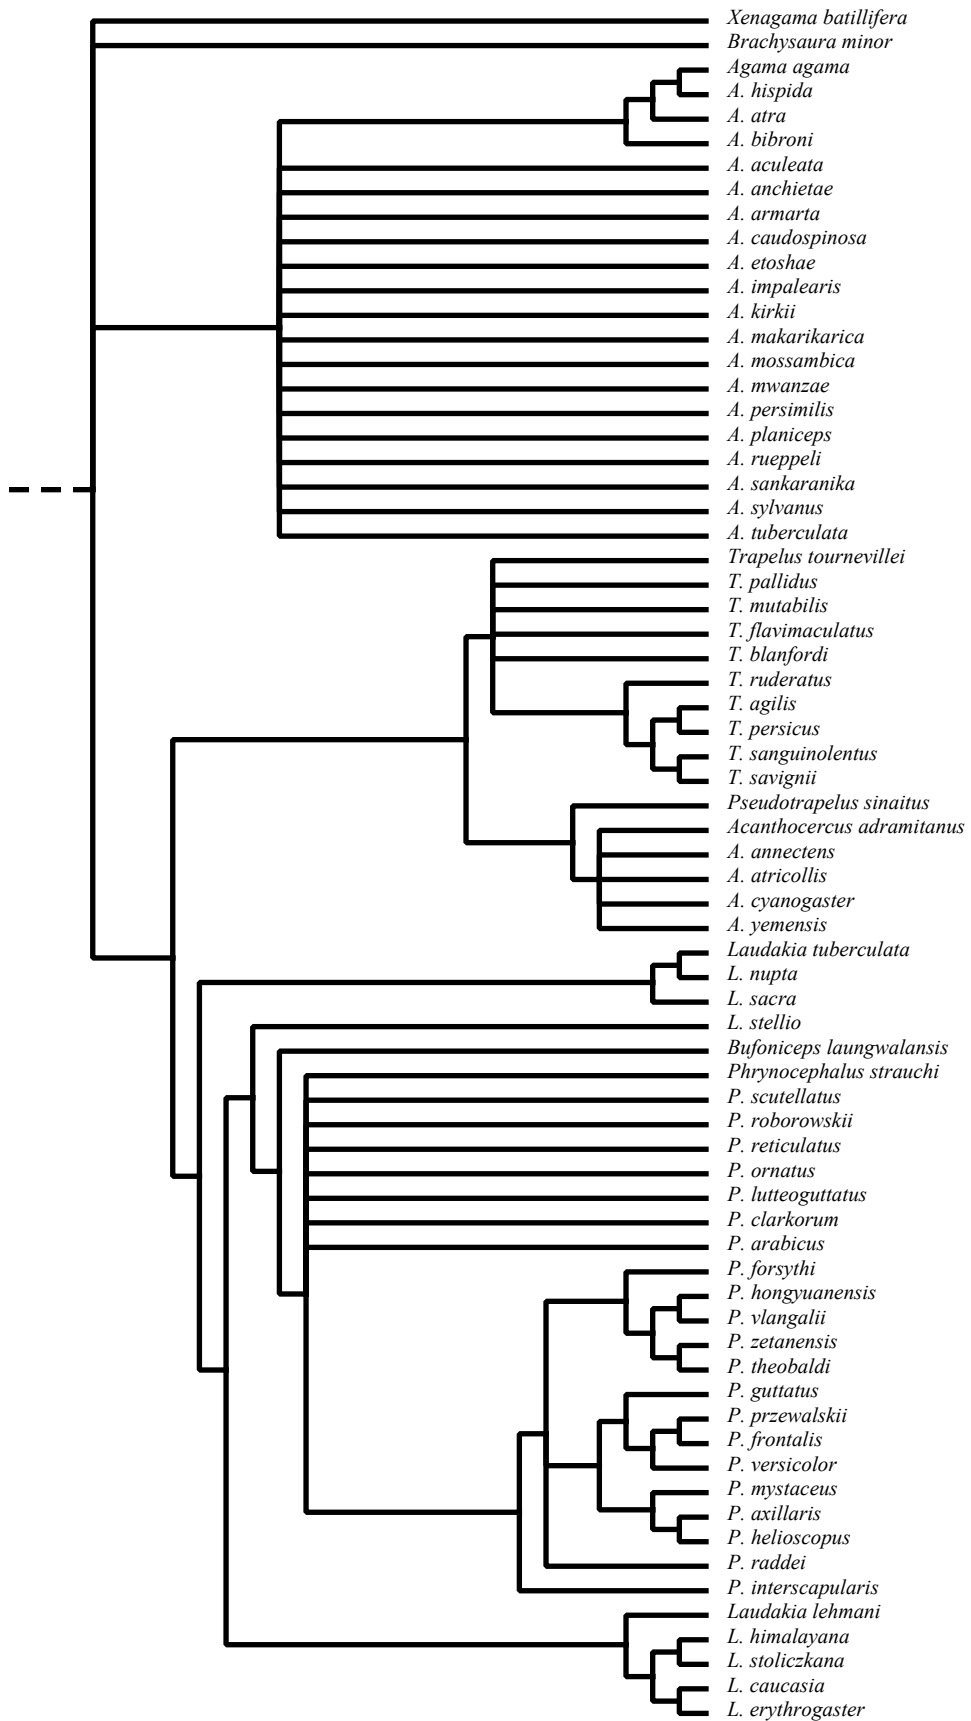

Table 1. *Species data*  
(SVL: snout-vent length; SSD: sexual size dimorphism)

| species                          | total | dichromatism |           | ornamentation |      |        | body size<br>(mm SVL) | head<br>SSD | body<br>SSD | habitat<br>openness |
|----------------------------------|-------|--------------|-----------|---------------|------|--------|-----------------------|-------------|-------------|---------------------|
|                                  |       | 'hidden'     | 'exposed' | dimorphism    | male | female |                       |             |             |                     |
| <i>Acanthocercus adramitanus</i> | 5     | 1            | 4         | 3             | 3    | 1      | 120                   | 1.1622      | 1.2         | 0                   |
| <i>A. annectens</i>              | 1     | 1            | 0         | 1             | 1    | 0      | 120                   | 1           | 1.5         |                     |
| <i>A. atricollis</i>             | 5     | 2            | 3         | 1             | 2    | 2      | 145                   |             | 1           | 0                   |
| <i>A. cyanogaster</i>            | 2     | 2            | 0         | 1             | 1    | 0      | 120                   | 1.2222      | 1.2         |                     |
| <i>A. yemensis</i>               |       |              |           | 0             | 0    | 0      | 120                   | 1.093       | 1.0909      | 0                   |
| <i>Acanthosaura armarta</i>      | 0     | 0            | 0         | 2             | 3    | 3      | 130                   | 1           | 1.1304      | 1                   |
| <i>A. capra</i>                  | 1     | 1            | 0         | 3             | 4    | 4      | 110                   | 1           | 1.2222      | 1                   |
| <i>A. crucigera</i>              | 1     | 1            | 0         | 2             | 4    | 3      | 98.5                  | 1           | 1           | 1                   |
| <i>A. lepidogaster</i>           | 0     | 0            | 0         | 0             | 3    | 3      | 90                    | 1           | 1           | 1                   |
| <i>Agama aculeata</i>            | 1     | 1            | 0         | 1             | 3    | 2      | 101.2                 | 1.1364      | 1.2091      | 0                   |
| <i>A. agama</i>                  | 11    | 4            | 7         | 4             | 2    | 0      | 122                   |             |             | 0                   |
| <i>A. anchietae</i>              | 4     | 3            | 1         | 3             | 3    | 3      | 105                   | 1.25        | 1.1667      | 0                   |
| <i>A. armarta</i>                | 1     | 1            | 0         | 0             | 2    | 2      |                       |             |             | 0                   |
| <i>A. atra</i>                   | 4     | 2            | 2         | 4             | 3    | 2      | 100                   |             | 1.2195      | 0                   |
| <i>A. bibroni</i>                |       |              |           | 2             | 1    | 0      | 120                   | 1           | 1.5         |                     |

Table 1. (continued)

| species                        | total | dichromatism |           | ornamentation |      |        | body size<br>(mm SVL) | head<br>SSD | body<br>SSD | habitat<br>openness |
|--------------------------------|-------|--------------|-----------|---------------|------|--------|-----------------------|-------------|-------------|---------------------|
|                                |       | 'hidden'     | 'exposed' | dimorphism    | male | female |                       |             |             |                     |
| <i>A. caudospinosa</i>         |       |              |           | 0             | 1    | 1      | 120                   | 1.1818      | 1.2         |                     |
| <i>A. etoshae</i>              | 1     | 1            | 0         | 0             | 0    | 0      |                       |             |             | 0                   |
| <i>A. hispida</i>              | 7     | 3            | 4         | 2             | 3    | 2      | 92                    |             | 1           | 0                   |
| <i>A. impalearis</i>           | 5     | 2            | 3         | 1             | 1    | 1      | 113                   | 1           | 1.0691      | 0                   |
| <i>A. kirkii</i>               | 3     | 2            | 1         | 3             | 4    | 4      |                       |             |             | 0                   |
| <i>A. makarikarica</i>         | 1     | 1            | 0         | 0             | 2    | 2      |                       |             |             | 0                   |
| <i>A. mossambica</i>           | 4     | 2            | 2         | 3             | 3    | 3      |                       |             |             | 0                   |
| <i>A. mwanzae</i>              |       |              |           | 0             | 1    | 1      | 95                    | 1           | 1.2667      |                     |
| <i>A. persimilis</i>           | 3     | 2            | 1         | 0             | 0    | 0      | 85                    | 1           |             |                     |
| <i>A. planiceps</i>            | 4     | 2            | 2         | 3             | 2    | 1      | 99.3                  |             | 1.0689      | 0                   |
| <i>A. rueppeli</i>             |       |              |           | 0             | 1    | 1      | 90                    | 1           | 1.0588      |                     |
| <i>A. sankaranika</i>          |       |              |           | 0             | 0    | 0      | 70                    | 1           | 1           |                     |
| <i>A. sylvanus</i>             | 10    | 3            | 7         | 1             | 1    | 1      | 100                   |             | 1.1765      | 1                   |
| <i>A. tuberculata</i>          | 0     | 0            | 0         |               |      |        | 120                   |             | 1.0619      |                     |
| <i>Amphibolurus muricatus</i>  | 0     | 0            | 0         | 1             | 1    | 1      |                       |             |             | 0                   |
| <i>A. nobbi</i>                | 0     | 0            | 0         | 0             | 0    | 0      |                       |             |             | 0                   |
| <i>A. norrisi</i>              |       |              |           | 0             | 1    | 1      |                       |             |             | 0                   |
| <i>Aphaniotis acutirostris</i> | 1     | 1            | 0         | 1             | 1    | 1      | 53                    |             | 1.0707      | 1                   |
| <i>A. fusca</i>                | 1     | 1            | 0         | 2             | 2    | 1      | 64                    | 1.0667      | 1.1327      | 1                   |
| <i>A. ornata</i>               | 0     |              |           |               |      |        |                       |             |             |                     |
| <i>Brachysaura minor</i>       | 3     | 0            | 3         | 0             | 2    | 2      | 87.5                  |             | 1           | 0                   |
| <i>Bronchocela celebensis</i>  | 0     |              |           | 0             | 0    | 0      |                       |             |             |                     |

Table 1. (continued)

| species                             | total | dichromatism |           | ornamentation |      |        | body size<br>(mm SVL) | head<br>SSD | body<br>SSD | habitat<br>openness |
|-------------------------------------|-------|--------------|-----------|---------------|------|--------|-----------------------|-------------|-------------|---------------------|
|                                     |       | 'hidden'     | 'exposed' | dimorphism    | male | female |                       |             |             |                     |
| <i>B. cristatella</i> <sup>a</sup>  | 2     | 2            | 0         | 2             | 2    | 2      | 101.7                 |             | 1.1176      | 1                   |
| <i>B. jubata</i> <sup>a</sup>       |       |              |           | 1             | 3    | 3      | 135                   | 1.1111      | 1.2857      | 1                   |
| <i>B. marmorata</i>                 |       |              |           | 4             | 3    | 2      | 95                    | 1.1481      | 1.1875      |                     |
| <i>B. smaragdina</i>                |       |              |           | 0             | 0    | 0      | 100                   | 1           | 1.1111      |                     |
| <i>Bufoinceps laungwalansis</i>     | 0     | 0            | 0         | 0             | 0    | 0      | 65                    |             |             | 0                   |
| <i>Caimanops amphiboluroides</i>    | 0     | 0            | 0         | 0             | 1    | 1      |                       |             |             | 0                   |
| <i>Calotes calotes</i> <sup>a</sup> | 5     | 3            | 2         | 3             | 3    | 2      | 110                   |             | 1.1         | 1                   |
| <i>C. ceylonensis</i>               |       |              |           | 2             | 2    | 1      |                       |             |             | 1                   |
| <i>C. ellioti</i>                   |       |              |           | 2             | 2    | 2      | 75                    |             |             |                     |
| <i>C. emma</i>                      | 2     | 1            | 1         | 0             | 4    | 4      | 105                   | 1           | 1           | 1                   |
| <i>C. grandiquamis</i>              |       |              |           | 4             | 3    | 2      |                       |             |             |                     |
| <i>C. jerdoni</i>                   |       |              |           | 3             | 3    | 3      | 85                    |             |             | 1                   |
| <i>C. kinabaluensis</i>             | 1     | 1            | 0         | 3             | 3    | 2      | 140                   |             |             | 1                   |
| <i>C. liocephalus</i>               |       |              |           | 4             | 4    | 2      | 90                    |             |             | 1                   |
| <i>C. mystaceus</i> <sup>a</sup>    | 0     | 0            | 0         | 4             | 4    | 3      | 120                   | 1.0571      | 1.1163      | 1                   |
| <i>C. nemoricola</i> <sup>a</sup>   | 2     | 2            | 0         | 5             | 4    | 2      | 108.5                 |             | 1.1793      | 1                   |
| <i>C. nigrilabris</i>               | 2     | 2            | 0         | 4             | 3    | 2      | 86                    |             | 1.1467      | 1                   |
| <i>C. rouxii</i>                    | 5     | 2            | 3         | 4             | 2    | 2      |                       |             |             | 1                   |
| <i>C. versicolor</i> <sup>a</sup>   | 4     | 2            | 2         | 4             | 4    | 3      | 100                   | 1.0588      | 1.25        | 1                   |
| <i>Ceratophora aspera</i>           | 2     | 2            | 0         | 2             | 2    | 2      | 33                    | 1           | 1           | 1                   |

Table 1. (continued)

| species                                | total | dichromatism |           | ornamentation |      |        | body size<br>(mm SVL) | head<br>SSD | body<br>SSD | habitat<br>openness |
|----------------------------------------|-------|--------------|-----------|---------------|------|--------|-----------------------|-------------|-------------|---------------------|
|                                        |       | 'hidden'     | 'exposed' | dimorphism    | male | female |                       |             |             |                     |
| <i>C. stoddarti</i>                    | 3     | 3            | 0         | 3             | 2    | 1      | 80                    |             |             | 1                   |
| <i>C. tennentii</i>                    | 3     | 2            | 1         | 2             | 2    | 2      |                       |             |             | 1                   |
| <i>Chelosania brunnea</i> <sup>a</sup> | 0     | 0            | 0         | 0             | 2    | 2      |                       |             |             | 0                   |
| <i>Chlamydosaurus kingii</i>           | 1     | 1            | 0         | 1             | 2    | 2      | 250                   |             | 1.1905      | 0                   |
| <i>Cophotis ceylanica</i>              | 0     | 0            | 0         | 2             | 4    | 2      | 63                    | 1           | 1           | 1                   |
| <i>C. sumatrana</i>                    |       |              |           | 0             | 3    | 3      | 75                    |             | 1           | 1                   |
| <i>Cryptagama aurita</i>               | 0     | 0            | 0         | 0             | 0    | 0      |                       |             |             | 0                   |
| <i>Ctenophorus caudicinctus</i>        | 1     | 1            | 0         | 0             | 1    | 1      |                       |             |             | 0                   |
| <i>C. clayi</i>                        |       |              |           | 0             | 0    | 0      |                       |             |             | 0                   |
| <i>C. cristatus</i>                    | 0     | 0            | 0         | 0             | 2    | 2      | 110                   |             | 1.1259      | 0                   |
| <i>C. decresii</i>                     | 4     | 3            | 1         | 0             | 1    | 0      | 75                    |             | 1.1538      | 0                   |
| <i>C. femoralis</i>                    | 1     | 1            | 0         | 0             | 0    | 0      | 47.9                  |             | 1.0551      | 0                   |
| <i>C. fionni</i>                       | 6     | 3            | 3         | 0             | 1    | 0      |                       |             |             | 0                   |
| <i>C. fordi</i>                        | 0     | 0            | 0         | 0             | 0    | 0      |                       |             |             | 0                   |
| <i>C. gibba</i>                        |       |              |           | 0             | 0    | 0      |                       |             |             | 0                   |
| <i>C. isolepis</i>                     | 4     | 3            | 1         | 0             | 0    | 0      |                       |             |             | 0                   |
| <i>C. maculatus</i>                    | 0     | 0            | 0         | 0             | 0    | 0      | 44.3                  |             | 1           | 0                   |
| <i>C. maculosus</i>                    | 0     | 0            | 0         | 0             | 1    | 1      | 63                    |             |             |                     |
| <i>C. mckenzii</i>                     | 1     | 1            | 0         | 0             | 0    | 0      |                       |             |             | 0                   |
| <i>C. nuchalis</i>                     | 0     | 0            | 0         | 0             | 1    | 1      |                       |             |             | 0                   |
| <i>C. ornatus</i>                      | 2     | 2            | 0         | 0             | 0    | 0      |                       |             |             | 0                   |
| <i>C. pictus</i>                       | 3     | 2            | 1         | 0             | 1    | 1      |                       |             |             | 0                   |



Table 1. (continued)

| species                                    | total | dichromatism |           | ornamentation |      |        | body size<br>(mm SVL) | head<br>SSD | body<br>SSD | habitat<br>openness |
|--------------------------------------------|-------|--------------|-----------|---------------|------|--------|-----------------------|-------------|-------------|---------------------|
|                                            |       | 'hidden'     | 'exposed' | dimorphism    | male | female |                       |             |             |                     |
| <i>C. reticulatus</i>                      | 3     | 2            | 1         | 0             | 0    | 0      |                       |             |             | 0                   |
| <i>C. rufescens</i>                        |       |              |           | 0             | 0    | 0      |                       |             |             | 0                   |
| <i>C. salinarum</i>                        | 0     | 0            | 0         | 0             | 1    | 1      |                       |             |             |                     |
| <i>C. scutulatus</i>                       | 0     | 0            | 0         | 0             | 1    | 1      |                       |             |             | 0                   |
| <i>C. vadrappa</i>                         | 3     | 2            | 1         | 1             | 1    | 0      |                       |             |             | 0                   |
| <i>C. yinnietharra</i>                     | 0     | 0            | 0         | 0             | 0    | 0      |                       |             |             | 0                   |
| <i>Dendragama boulengeri</i> <sup>a</sup>  | 0     | 0            | 0         | 0             | 4    | 2      | 75                    | 1           | 1.0714      | 1                   |
| <i>Diporiphora albilabris</i> <sup>a</sup> |       |              |           | 0             | 0    | 0      |                       |             |             | 0                   |
| <i>D. australis</i> <sup>a</sup>           |       |              |           | 0             | 0    | 0      |                       |             |             | 0                   |
| <i>D. bennetti</i> <sup>a</sup>            | 0     | 0            | 0         | 0             | 1    | 1      |                       |             |             | 0                   |
| <i>D. bilineata</i> <sup>a</sup>           |       |              |           | 0             | 0    | 0      |                       |             |             | 0                   |
| <i>D. convergens</i>                       |       |              |           | 0             | 0    | 0      |                       |             |             |                     |
| <i>D. lalliae</i> <sup>a</sup>             |       |              |           | 0             | 1    | 1      |                       |             |             | 0                   |
| <i>D. lingua</i>                           |       |              |           | 0             | 0    | 0      |                       |             |             | 0                   |
| <i>D. magna</i>                            |       |              |           | 0             | 0    | 0      |                       |             |             | 0                   |
| <i>D. pindan</i>                           |       |              |           | 0             | 0    | 0      |                       |             |             | 0                   |
| <i>D. reginae</i>                          | 0     | 0            | 0         | 0             | 0    | 0      |                       |             |             | 0                   |
| <i>D. superba</i>                          | 0     | 0            | 0         | 0             | 0    | 0      |                       |             |             | 0                   |
| <i>D. valens</i>                           |       |              |           | 0             | 0    | 0      |                       |             |             | 0                   |
| <i>D. winneckeii</i>                       |       |              |           | 0             | 0    | 0      |                       |             |             | 0                   |
| <i>Draco bimaculatus</i>                   |       |              |           | 3             | 2    | 1      | 65                    | 1           | 1           |                     |
| <i>D. blanfordi</i>                        | 2     | 1            | 1         | 3             | 2    | 1      | 105                   |             |             | 1                   |

Table 1. (continued)

| species                          | total | dichromatism |           | ornamentation |      |        | body size<br>(mm SVL) | head<br>SSD | body<br>SSD | habitat<br>openness |
|----------------------------------|-------|--------------|-----------|---------------|------|--------|-----------------------|-------------|-------------|---------------------|
|                                  |       | 'hidden'     | 'exposed' | dimorphism    | male | female |                       |             |             |                     |
| <i>D. cristatellus</i>           |       |              |           | 1             | 1    | 1      |                       |             |             |                     |
| <i>D. cyanopteris</i>            |       |              |           | 2             | 3    | 3      | 85                    | 1           | 1           |                     |
| <i>D. dussumieri</i>             |       |              |           | 3             | 2    | 1      | 82                    |             | 1           |                     |
| <i>D. fimbriatus</i>             | 2     | 1            | 1         | 4             | 3    | 2      | 75                    | 1           | 1           | 1                   |
| <i>D. haematopogon</i>           | 1     | 1            | 0         | 1             | 1    | 1      | 76                    | 1           | 1           | 1                   |
| <i>D. lineatus</i>               | 2     | 1            | 1         | 1             | 1    | 1      | 65.5                  |             | 1           |                     |
| <i>D. maculatus</i> <sup>a</sup> | 2     | 1            | 1         | 4             | 3    | 2      | 78.1                  | 1           | 1.0699      | 1                   |
| <i>D. maximus</i>                | 1     | 1            | 0         | 1             | 1    | 1      | 95                    |             |             | 1                   |
| <i>D. melanopogon</i>            | 1     | 1            | 0         | 1             | 1    | 1      | 72                    | 1           | 1           | 1                   |
| <i>D. mindanensis</i>            |       |              |           | 1             | 1    | 1      | 100                   | 1           | 1           |                     |
| <i>D. obscurus</i> <sup>a</sup>  | 1     | 1            | 0         | 5             | 3    | 1      | 98.3                  |             | 1.1988      | 1                   |
| <i>D. quinquefasciatus</i>       | 1     | 1            | 0         | 3             | 2    | 1      | 90                    | 1           | 1           | 1                   |
| <i>D. spilopterus</i>            |       |              |           | 3             | 2    | 1      | 78                    | 1           | 1           |                     |
| <i>D. taeniopterus</i>           | 1     | 1            | 0         | 3             | 2    | 1      | 80                    |             |             | 1                   |
| <i>D. volans</i> <sup>a</sup>    | 1     | 1            | 0         | 2             | 2    | 2      | 71.7                  |             | 1           | 1                   |
| <i>Gonocephalus belli</i>        | 0     | 0            | 0         | 3             | 4    | 4      | 137.5                 |             | 1.2222      | 1                   |
| <i>G. borneensis</i>             |       |              |           | 3             | 3    | 3      | 127                   |             | 1.1545      | 1                   |
| <i>G. chameleontinus</i>         | 0     | 0            | 0         | 3             | 4    | 4      | 142.5                 |             | 1.0755      | 1                   |
| <i>G. doriae</i>                 | 11    | 4            | 7         | 3             | 4    | 4      | 123.5                 |             | 1.0978      | 1                   |
| <i>G. grandis</i>                | 0     | 0            | 0         | 3             | 3    | 3      | 147                   |             | 1.1667      | 1                   |
| <i>G. kuhli</i>                  |       |              |           | 3             | 3    | 3      |                       |             |             | 1                   |
| <i>G. lacunosus</i>              |       |              |           | 3             | 3    | 3      | 135                   |             | 1           | 1                   |

Table 1. (continued)

| species                        | dichromatism |          |           | ornamentation |      |        | body size<br>(mm SVL) | head<br>SSD | body<br>SSD | habitat<br>openness |
|--------------------------------|--------------|----------|-----------|---------------|------|--------|-----------------------|-------------|-------------|---------------------|
|                                | total        | 'hidden' | 'exposed' | dimorphism    | male | female |                       |             |             |                     |
| <i>G. lepidogaster</i>         |              |          |           | 3             | 3    | 3      | 85                    | 1.1333      | 1           |                     |
| <i>G. liogaster</i>            | 0            | 0        | 0         | 3             | 3    | 3      | 130                   | 1           | 1.1818      |                     |
| <i>G. megalepis</i>            |              |          |           | 3             | 3    | 3      |                       |             |             |                     |
| <i>G. robinsonii</i>           | 0            | 0        | 0         | 1             | 4    | 4      | 130                   |             | 1.0656      | 1                   |
| <i>G. semperi</i>              |              |          |           | 3             | 4    | 3      | 100                   | 1.1579      | 1.1111      | 1                   |
| <i>Harpesaurus beccari</i>     |              |          |           | 3             | 3    | 4      | 65                    |             | 1           |                     |
| <i>H. boorneensis</i>          |              |          |           | 2             | 3    | 2      | 52                    |             | 1           | 1                   |
| <i>H. modigliani</i>           |              |          |           | 5             | 4    | 4      |                       |             |             | 1                   |
| <i>H. thescelorhinos</i>       | 0            | 0        | 0         | 8             | 5    | 3      | 51.5                  |             | 1           |                     |
| <i>H. tricinctus</i>           |              |          |           | 5             | 4    | 3      |                       |             |             | 1                   |
| <i>Hydrosaurus amboniensis</i> | 0            | 0        | 0         | 2             | 2    | 3      |                       |             |             | 1                   |
| <i>H. pustulatus</i>           | 0            | 0        | 0         | 4             | 4    | 4      |                       |             |             | 1                   |
| <i>H. weberi</i>               | 0            | 0        | 0         | 3             | 3    | 4      |                       |             |             | 1                   |
| <i>Hypsilurus auritus</i>      |              |          |           | 0             | 2    | 2      |                       |             |             | 1                   |
| <i>H. binotatus</i>            |              |          |           | 3             | 3    | 3      |                       |             |             | 1                   |
| <i>H. boydii</i>               |              |          |           | 0             | 3    | 3      |                       |             |             | 1                   |
| <i>H. dilophus</i>             | 0            | 0        | 0         | 5             | 5    | 4      | 185                   | 1           | 1.2333      | 1                   |
| <i>H. godeffroyi</i>           | 0            | 0        | 0         | 4             | 4    | 4      | 160                   | 1.25        | 1.3333      | 1                   |
| <i>H. modestus</i>             |              |          |           | 0             | 2    | 2      | 90                    | 1           | 1.125       | 1                   |
| <i>H. nigrigularis</i>         |              |          |           | 6             | 5    | 3      | 140                   | 1           | 1.2727      | 1                   |
| <i>H. spinipes</i>             | 0            | 0        | 0         | 0             | 3    | 3      | 110                   |             | 1           | 1                   |
| <i>Japalura brevipes</i>       | 7            | 3        | 4         |               |      |        | 61                    |             | 1           |                     |

Table 1. (continued)

| species                                   | total | dichromatism |           | dimorphism | ornamentation |        | body size<br>(mm SVL) | head<br>SSD | body<br>SSD | habitat<br>openness |
|-------------------------------------------|-------|--------------|-----------|------------|---------------|--------|-----------------------|-------------|-------------|---------------------|
|                                           |       | 'hidden'     | 'exposed' |            | male          | female |                       |             |             |                     |
| <i>J. fasciatus</i>                       | 1     | 1            | 0         | 3          | 3             | 2      | 73                    | 1.0909      | 1.0896      |                     |
| <i>J. flaviceps</i>                       |       |              |           | 4          | 3             | 2      | 70                    | 1.0667      | 1.0769      |                     |
| <i>J. makii</i>                           | 1     | 1            | 0         |            |               |        |                       |             |             |                     |
| <i>J. polygonata</i>                      |       |              |           | 2          | 2             | 2      | 75                    | 1.1765      | 1.1538      |                     |
| <i>J. splendida</i>                       | 0     | 0            | 0         | 1          | 2             | 1      | 86                    | 1.1053      | 1.1944      |                     |
| <i>J. swinhonis</i>                       |       |              |           | 1          | 4             | 3      | 77                    | 1.1944      | 1.2833      | 1                   |
| <i>J. tricarinata</i>                     | 3     | 0            | 3         | 0          | 0             | 0      | 50                    | 1           | 1           | 1                   |
| <i>J. variegata</i>                       |       |              |           | 3          | 2             | 1      |                       |             |             |                     |
| <i>Laudakia caucasia</i>                  | 3     | 2            | 1         | 0          | 1             | 1      | 150                   | 1.1304      | 1.1111      | 0                   |
| <i>L. erythrogaster</i>                   |       |              |           | 0          | 0             | 0      | 150                   | 1.0952      | 1.25        |                     |
| <i>L. himalayana</i>                      |       |              |           | 1          | 1             | 0      | 145                   | 1.1667      | 1.3182      |                     |
| <i>L. lehmani</i>                         | 1     | 1            | 0         | 0          | 0             | 0      | 130                   | 1           | 1.1818      |                     |
| <i>L. nupta</i>                           |       |              |           | 1          | 1             | 0      | 140                   | 1           | 1.1667      | 0                   |
| <i>L. sacra</i>                           | 0     | 0            | 0         | 1          | 2             | 2      | 143                   | 1.0857      | 1.2588      | 0                   |
| <i>L. stellio</i>                         | 2     | 1            | 1         | 0          | 2             | 2      | 120                   | 1.2143      | 1.0909      | 0                   |
| <i>L. stoliczkana</i>                     |       |              |           | 0          | 0             | 0      | 135                   | 1           | 1.08        |                     |
| <i>L. tuberculata</i>                     | 0     | 0            | 0         | 0          | 0             | 0      | 110                   | 1.1579      | 1.2941      |                     |
| <i>Leiolepis belliana</i>                 | 0     | 0            | 0         | 0          | 0             | 0      | 130                   | 1           | 1           | 0                   |
| <i>L. reevesi</i>                         | 1     | 0            | 1         | 0          | 0             | 0      | 110                   | 1.0667      | 1.1579      | 0                   |
| <i>Lophocalotes ludekingi</i>             |       |              |           | 1          | 3             | 2      |                       |             |             | 1                   |
| <i>Lophognathus gilberti</i> <sup>a</sup> | 0     | 0            | 0         | 2          | 2             | 1      |                       |             |             | 0                   |
| <i>L. longirostris</i> <sup>a</sup>       | 1     | 1            | 0         | 2          | 2             | 1      | 95                    |             | 1.1243      | 0                   |

Table 1. (continued)

| species                           | total | dichromatism |           | ornamentation |      |        | body size<br>(mm SVL) | head<br>SSD | body<br>SSD | habitat<br>openness |
|-----------------------------------|-------|--------------|-----------|---------------|------|--------|-----------------------|-------------|-------------|---------------------|
|                                   |       | 'hidden'     | 'exposed' | dimorphism    | male | female |                       |             |             |                     |
| <i>L. maculilabris</i>            |       |              |           | 0             | 2    | 2      |                       |             |             |                     |
| <i>L. temporalis</i> <sup>a</sup> | 0     | 0            | 0         | 3             | 3    | 2      |                       |             |             | 0                   |
| <i>Lyriocephalus scutatus</i>     | 3     | 3            | 0         | 4             | 5    | 4      | 150                   | 1.0625      | 1.3636      | 1                   |
| <i>Mictopholis austeniana</i>     |       |              |           | 1             | 1    | 1      |                       |             |             |                     |
| <i>Moloch horridus</i>            | 0     | 0            | 0         | 0             | 1    | 1      |                       |             |             | 0                   |
| <i>Oriocalotes paulus</i>         |       |              |           | 0             | 2    | 2      | 48                    |             | 1           |                     |
| <i>Otocryptis beddomii</i>        | 1     | 1            | 0         | 3             | 2    | 1      | 35                    | 1.087       | 1           |                     |
| <i>O. wiegamanni</i>              | 1     | 1            | 0         | 4             | 2    | 0      | 60                    | 1           | 1.2         | 1                   |
| <i>Phoxophrys cephalum</i>        |       |              |           | 2             | 2    | 1      |                       |             |             | 1                   |
| <i>P. nigrilabris</i>             |       |              |           | 3             | 2    | 0      | 53                    |             | 1           | 1                   |
| <i>Phrynocephalus arabicus</i>    | 0     | 0            | 0         | 0             | 0    | 0      | 50                    | 1           | 1.25        | 0                   |
| <i>P. axillaris</i>               | 0     | 0            | 0         | 0             | 0    | 0      | 53                    | 1.0667      | 1.06        |                     |
| <i>P. clarkorum</i>               | 0     | 0            | 0         | 0             | 0    | 0      | 38.5                  | 1           | 1.2031      | 0                   |
| <i>P. forsythi</i>                | 0     | 0            | 0         | 0             | 0    | 0      | 48                    | 1.0952      | 1           |                     |
| <i>P. frontalis</i>               | 0     | 0            | 0         | 0             | 0    | 0      |                       |             |             |                     |
| <i>P. guttatus</i>                | 0     | 0            | 0         | 0             | 0    | 0      | 40                    | 1           | 1           | 0                   |
| <i>P. helioscopus</i>             | 0     | 0            | 0         | 0             | 0    | 0      | 52                    | 1           | 1           | 0                   |
| <i>P. hongyuanensis</i>           | 0     | 0            | 0         | 0             | 0    | 0      | 52                    | 1.0714      | 1           | 0                   |
| <i>P. interscapularis</i>         | 0     | 0            | 0         | 0             | 0    | 0      | 36                    | 1           | 1.125       | 0                   |
| <i>P. lutteoguttatus</i>          | 0     | 0            | 0         | 0             | 0    | 0      | 45                    | 1           | 1.125       | 0                   |
| <i>P. mystaceus</i>               | 0     | 0            | 0         | 0             | 0    | 0      | 85                    | 1.0667      | 1.1184      | 0                   |
| <i>P. ornatus</i>                 | 0     | 0            | 0         | 0             | 0    | 0      | 42                    | 1           | 1           | 0                   |

Table 1. (continued)

| species                                     | total | dichromatism |           | ornamentation |      |        | body size<br>(mm SVL) | head<br>SSD | body<br>SSD | habitat<br>openness |
|---------------------------------------------|-------|--------------|-----------|---------------|------|--------|-----------------------|-------------|-------------|---------------------|
|                                             |       | 'hidden'     | 'exposed' | dimorphism    | male | female |                       |             |             |                     |
| <i>P. przewalskii</i>                       | 0     | 0            | 0         | 0             | 0    | 0      | 60                    | 1           | 1           |                     |
| <i>P. raddei</i>                            |       |              |           | 0             | 0    | 0      | 45                    | 1           | 1           | 0                   |
| <i>P. reticulatus</i>                       | 0     | 0            | 0         | 0             | 0    | 0      | 45                    | 1           | 1           | 0                   |
| <i>P. roborowskii</i>                       |       |              |           | 0             | 0    | 0      | 50                    | 1           | 1           |                     |
| <i>P. scutellatus</i>                       |       |              |           | 0             | 0    | 0      | 45                    | 1           | 1           |                     |
| <i>P. strauchi</i>                          |       |              |           | 0             | 0    | 0      | 45                    | 1           | 1           |                     |
| <i>P. theobaldi</i>                         | 0     | 0            | 0         | 0             | 0    | 0      | 45                    | 1           | 1           | 0                   |
| <i>P. versicolor</i>                        | 0     | 0            | 0         | 0             | 0    | 0      | 50                    | 1           | 1           | 0                   |
| <i>P. vlangalii</i>                         | 0     | 0            | 0         | 0             | 0    | 0      | 58                    | 1           | 1           |                     |
| <i>P. zetanensis</i>                        | 0     | 0            | 0         | 0             | 0    | 0      |                       |             |             |                     |
| <i>Physignathus cocincinus</i> <sup>a</sup> | 0     | 0            | 0         | 4             | 4    | 3      | 210                   |             | 1.1667      | 1                   |
| <i>P. leseuri</i> <sup>a</sup>              | 3     | 2            | 1         | 4             | 4    | 3      | 250                   |             | 1.25        | 1                   |
| <i>Pogona barbata</i> <sup>a</sup>          | 1     | 1            | 0         | 1             | 2    | 1      | 189                   |             | 1.0559      | 0                   |
| <i>P. microlepidota</i>                     | 0     | 0            | 0         | 1             | 2    | 1      |                       |             |             |                     |
| <i>P. minima</i>                            |       |              |           | 1             | 2    | 1      |                       |             |             | 0                   |
| <i>P. minor</i>                             | 0     | 0            | 0         | 1             | 2    | 1      |                       |             |             | 0                   |
| <i>P. mitchelli</i>                         | 0     | 0            | 0         | 1             | 2    | 1      | 155                   |             | 1.1071      |                     |
| <i>P. nullabor</i>                          |       |              |           | 1             | 2    | 1      | 113                   |             | 1           | 0                   |
| <i>P. vitticeps</i>                         | 0     | 0            | 0         | 1             | 2    | 1      | 180                   |             | 1.125       | 0                   |
| <i>Psammophilus blanfordanus</i>            | 11    | 4            | 7         | 1             | 2    | 1      | 89                    | 1.0952      | 1.3692      | 0                   |
| <i>P. dorsalis</i>                          | 11    | 4            | 7         | 1             | 1    | 0      | 110                   | 1.2083      | 1.1579      | 0                   |
| <i>Pseudocalotes microlepis</i>             |       |              |           | 4             | 4    | 3      | 85                    |             | 1.3077      | 1                   |

Table 1. (continued)

| species                                 | total | dichromatism |           | dimorphism | ornamentation |        | body size<br>(mm SVL) | head<br>SSD | body<br>SSD | habitat<br>openness |
|-----------------------------------------|-------|--------------|-----------|------------|---------------|--------|-----------------------|-------------|-------------|---------------------|
|                                         |       | 'hidden'     | 'exposed' |            | male          | female |                       |             |             |                     |
| <i>P. tympanistriga</i>                 | 0     | 0            | 0         | 0          | 2             | 2      | 70                    | 1           | 1.0769      | 1                   |
| <i>Pseudotrapelus sinaitus</i>          | 5     | 3            | 2         | 1          | 1             | 0      | 95                    | 1.0909      | 1.2667      | 0                   |
| <i>Ptyctolaemus gularis</i>             |       |              |           | 4          | 4             | 3      | 80                    |             |             |                     |
| <i>P. phuwanensis</i>                   | 0     | 0            | 0         | 4          | 4             | 3      | 84                    |             | 1           | 0                   |
| <i>Salea anamallayana</i>               |       |              |           | 6          | 5             | 4      | 85                    | 1.0882      | 1.0625      |                     |
| <i>S. horsefieldi</i> <sup>a</sup>      |       |              |           | 5          | 5             | 2      | 85                    | 1.0625      | 1.1333      | 1                   |
| <i>S. kakhienensis</i>                  |       |              |           | 5          | 4             | 2      | 110                   | 1.1481      | 1.2222      | 1                   |
| <i>Sitana ponticeriana</i> <sup>a</sup> | 1     | 1            | 0         | 4          | 2             | 0      | 55                    | 1.0857      | 1.1         | 0                   |
| <i>Trapelus agilis</i>                  | 2     | 2            | 0         | 0          | 0             | 0      | 90                    | 1.1333      | 1.125       | 0                   |
| <i>T. blanfordi</i>                     |       |              |           | 0          | 1             | 1      | 100                   | 1           | 1.1765      | 0                   |
| <i>T. flavimaculatus</i>                |       |              |           | 0          | 1             | 0      | 105                   | 1.25        | 1.1667      |                     |
| <i>T. mutabilis</i>                     |       |              |           | 0          | 1             | 1      | 90                    | 1           | 1.125       |                     |
| <i>T. pallidus</i>                      |       |              |           | 0          | 0             | 0      | 70                    | 1           | 1.1667      | 0                   |
| <i>T. persicus</i>                      |       |              |           | 2          | 1             | 0      |                       |             |             | 0                   |
| <i>T. ruderatus</i>                     |       |              |           | 0          | 0             | 0      | 70                    | 1.2         | 1.0769      |                     |
| <i>T. sanguinolentus</i>                | 6     | 3            | 3         | 0          | 0             | 0      | 115                   | 1.1071      | 1.15        | 0                   |
| <i>T. savignii</i>                      | 1     | 1            | 0         | 0          | 0             | 0      | 95                    | 1.0667      | 1.1176      |                     |
| <i>T. tournevillei</i>                  | 0     | 0            | 0         | 0          | 1             | 1      | 100                   | 1.1         | 1.1111      |                     |
| <i>Tympanocryptis adelaidensis</i>      | 0     | 0            | 0         | 0          | 0             | 0      | 41                    |             | 1           | 0                   |
| <i>T. cephalus</i>                      | 0     | 0            | 0         | 0          | 0             | 0      |                       |             |             | 0                   |
| <i>T. diemensis</i>                     |       |              |           | 0          | 0             | 0      |                       |             |             | 0                   |
| <i>T. intima</i>                        |       |              |           | 0          | 0             | 0      |                       |             |             | 0                   |

Table 1. (continued)

| species                       | total | dichromatism |           | dimorphism | ornamentation |        | body size<br>(mm SVL) | head<br>SSD | body<br>SSD | habitat<br>openness |
|-------------------------------|-------|--------------|-----------|------------|---------------|--------|-----------------------|-------------|-------------|---------------------|
|                               |       | 'hidden'     | 'exposed' |            | male          | female |                       |             |             |                     |
| <i>T. lineata</i>             | 2     | 1            | 1         | 0          | 0             | 0      |                       |             |             | 0                   |
| <i>T. parviceps</i>           | 0     | 0            | 0         | 0          | 0             | 0      |                       |             |             | 0                   |
| <i>T. tetraporphora</i>       | 0     | 0            | 0         | 0          | 0             | 0      |                       |             |             | 0                   |
| <i>Uromastix acanthinurus</i> | 0     | 0            | 0         | 0          | 1             | 1      | 220                   | 1           | 1.1         | 0                   |
| <i>U. aegyptia</i>            |       |              |           | 0          | 1             | 1      | 320                   | 1           | 1.28        |                     |
| <i>U. hardwicki</i>           | 0     | 0            | 0         | 0          | 1             | 1      | 204                   |             | 1.1591      | 0                   |
| <i>U. maliensis</i>           |       |              |           | 0          | 1             | 1      | 200                   | 1.0526      | 1.1111      |                     |
| <i>U. ocellata</i>            |       |              |           | 0          | 1             | 1      | 160                   |             |             |                     |
| <i>U. principes</i>           |       |              |           | 0          | 1             | 1      | 150                   | 1           | 1.25        |                     |
| <i>U. thomasi</i>             | 0     | 0            | 0         | 0          | 1             | 1      | 130                   |             |             | 0                   |
| <i>Xenagama batillifera</i>   | 2     | 2            | 0         | 0          | 1             | 1      | 65                    | 1           | 1.1818      |                     |

<sup>a</sup>Species occurring in several habitat types.
